# Supplementary material
Source: PubMed Central journal article supplement (PMC3132006)
Supplement: cdd2010118x1.pdf [file cdd2010118x1.pdf]

## ONLINE SUPPORTING INFORMATION

### **Regulation of autophagic activity by 14-3-3 $\zeta$ proteins associated with class III phosphatidylinositol-3-kinase**

*Mercedes Pozuelo Rubio*

Centro Andaluz de Biología Molecular y Medicina Regenerativa, Consejo Superior de  
Investigaciones Científicas. Sevilla. Spain.

Correspondence to Mercedes Pozuelo Rubio, CABIMER (SC4). Av. Américo Vesputio s/n, Sevilla-41092,  
Spain. TEL: (34)-663719656; FAX: (34)-954-461664 E-mail: [merce\\_pozo@yahoo.es](mailto:merce_pozo@yahoo.es)

**Supplementary Figure S1. C2-ceramide 10  $\mu$ M for 24 h does not induce cell death.** HeLa cells were left untreated or stimulated with C2-ceramide (10  $\mu$ M for 24 h) or TRAIL (1  $\mu$ g/ml) (generously provided by Dr. Lopez-Rivas) as a control of cell death. Cells were analyzed for the DNA content by flow cytometry. The percentage of death cells with sub-G1 DNA content is shown and the values represent mean  $\pm$  SD for three independent experiments.

**Supplementary Figure S2. Over expression of 14-3-3 $\zeta$  proteins block C2-ceramide cell death with autophagy.** HeLa and HEK293T cells left untransfected or HeLa cells stably expressing GFP-14-3-3 $\zeta$  and HEK293T cells transiently expressing GFP-14-3-3 $\zeta$  were stimulated with C2-ceramide (C2) (10  $\mu$ M) for 3 or 5 days. The percentage of living cells (Crystal violet) was expressed according to untreated cells and quantified (Quantification: N = 3, \*  $P=0.0148$ , \*\*  $P=0.00033$ , \*\*  $P=0.0019$ , \*\*  $P=0.0082$ , Student  $t$ -test).

**Supplementary Figure S3. Downregulation of endogenous 14-3-3 $\zeta$  sensitizes cells to autophagy.**

(A) MCF-7 cells stably expressing GFP-LC3 fusion protein were transfected either with siRNA oligonucleotide targeting 14-3-3 $\zeta$  or with a scrambled RNA oligonucleotide as described in Material and Methods. After 48 hours, untransfected cells (Control) or cells transfected with either with siRNA 14-3-3 $\zeta$  (14-3-3 $\zeta$ ) or scrambled siRNA (SC) were analysed using green fluorescence GFP-LC3 by microscopy. Bars = 10  $\mu$ m. Quantification of number of GFP-LC3 punctae per cell was performed by counting in a blinded experiment. Columns, average of three different experiments, set up at duplicated samples and counting 6 x 100 cells per sample (N=3, \*  $P=0.0004$ , \*\*  $P=0.0006$  Student  $t$ -test ). (B) As in (A) extracts from untransfected cells (Control) or transfected either with siRNA 14-3-3 $\zeta$  (14-3-3 $\zeta$ ) or scrambled siRNA (SC) were harvested (after 48 hours) for immunoblot analysis of LC3-I processing into LC3-II, GFP-LC3 processing into GFP, p62/SQSTM1 and endogenous 14-3-3 $\zeta$  isoform. Tubulin was used as a protein loading control. Endogenous LC3-II/Tubulin levels were quantified and the ratio presented as arbitrary units (N=3, \*  $P=0.0026$ , \*\*  $P=0.0072$ , Student  $t$ -test).

**Supplementary Figure S4. Downregulation of endogenous 14-3-3 $\zeta$  does not affect levels of expression of autophagy-related proteins.** Extracts of HeLa cells (30  $\mu$ g) untransfected (C) or transfected either with siRNA 14-3-3 $\zeta$  (14-3-3 $\zeta$ ) or scrambled siRNA (SC) for 48 hours were run on SDS/PAGE transferred to nitrocellulose membranes and probed with indicated antibodies.

**Supplementary Figure S5. Downregulation of endogenous 14-3-3 $\sigma$  and 14-3-3 $\theta$  sensitizes cells to autophagy.** (A) Extract of HeLa, MCF-7 and HEK293T cells (30  $\mu$ g) were run on SDS/PAGE transferred to nitrocellulose membranes and probed with indicated antibodies against different 14-3-3 isoforms. The 14-3-3 pan antibody recognized all of the different isoforms. GAPDH was used as a proteins loading control. (B) MCF-7 cells expressing GFP-LC3 were left untransfected (Control) or transfected either with siRNA oligonucleotide targeting 14-3-3 $\sigma$  (14-3-3 $\sigma$ ) or with a scrambled RNA oligonucleotide (SC) as described in Material and Methods. After 48 hours, MCF-7/GFP-LC3 cells were analysed using green fluorescence GFP-LC3 by microscopy. Quantification of number of GFP-LC3 punctae per cell was performed by counting in a blinded experiment. Columns, average of

three different experiments, set up at duplicated samples and counting 6 x 100 cells per sample (N=3, \*  $P=0,0018$ , \*\*  $P=0,0026$ , Student *t*-test). (C) As in (B) MCF-7 cells expressing GFP-LC3 were left untransfected (Control) or transfected either with siRNA oligonucleotide targeting 14-3-3 $\theta$  (14-3-3 $\theta$ ) or with a scrambled RNA oligonucleotide (SC). After 48 hours, cells were analysed using green fluorescence GFP-LC3 by microscopy. Quantification of number of GFP-LC3 punctae per cell was performed by counting in a blinded experiment. Columns, average of three different experiments, set up at duplicated samples and counting 6 x 100 cells per sample (N=3, \*  $P=0,0085$ , \*\*  $P=0,0031$ , Student *t*-test). (D) As in (B) extracts from MCF-7/GFP-LC3 untransfected cells (C) or transfected either with siRNA 14-3-3 $\sigma$  (14-3-3 $\sigma$ ) or scrambled siRNA (SC) for 48 hours were harvested for immunoblot analysis of LC3-I processing into LC3-II, GFP-LC3 processing into GFP, p62/SQSTM1 and endogenous 14-3-3 isoforms. GAPDH was used as a protein loading control. Endogenous LC3-II/GAPDH levels were quantified and the ratio presented as arbitrary units (N=3, \*  $P=0.00031$ , \*\*  $P=0.04$ , Student *t*-test). (E) As in (C) extracts from MCF-7/GFP-LC3 untransfected cells (C) or transfected either with siRNA 14-3-3 $\theta$  (14-3-3 $\theta$ ) or scrambled siRNA (SC) for 48 hours were harvested for immunoblot analysis of LC3-I processing into LC3-II, GFP-LC3 processing into GFP, p62/SQSTM1 and endogenous 14-3-3 isoforms. GAPDH was used as a protein loading control. Endogenous LC3-II/GAPDH levels were quantified and the ratio presented as arbitrary units (N=3, \*  $P=0.00039$ , \*\*  $P=0.0065$ , Student *t*-test).

**Supplementary Figure S6. hVps34 dissociates from 14-3-3 and is activated during C2-ceramide-induced autophagy in HEK293T cell.** HEK293T continuously growing in serum were left untreated or stimulated with C2-ceramide (10  $\mu$ M) for 24 h to promote autophagy. (A) Extracts (2 mg) from untreated (U) or C2-ceramide (10  $\mu$ M for 24 h) (C2) stimulated HEK293T cells were incubated with 1  $\mu$ g of Beclin-1 (Santa Cruz) antibody bound to Protein-G-Sepharose. The washed immunoprecipitates were resolved using SDS-PAGE, transferred to nitrocellulose and probed with DIG-14-3-3 (14-3-3 overlay), Beclin-1 (BD Biosciences) and hVps34 (Zymed) antibodies. The washed immunoprecipitates were also used for hVps34 *in vitro* kinase assay. Autoradiography shows levels of PI3P<sup>32</sup>. (Quantification of hVps34 *in vitro* kinase assay expressed as PI(3) fold change, N = 3, \*  $P=0.0005$ , Student *t*-test). (B) Extracts (1 mg) from untreated (U) or C2-ceramide (10  $\mu$ M for 24 h) (C2) stimulated HEK293T cells were incubated with 1  $\mu$ g of

hVps34 (Echelon Biosciences) antibody bound to Protein-G-Sepharose. The washed immunoprecipitates were used for hVps34 *in vitro* kinase assay and also to analyse interaction with 14-3-3 (DIG-14-3-3) and presence of Beclin-1 and hVps34 in the immunoprecipitates (Quantification of hVps34 *in vitro* kinase assay, N = 3, \*  $P=0.0064$ , Student *t*-test). A piece of the DIG-14-3-3 shown corresponds to hVps34 size. (C) Extracts (30  $\mu$ g) from HEK293T cells continuously grown in serum or stimulated with C2-ceramide (10  $\mu$ M) for 24 h to promote autophagy were run on SDS-PAGE, transferred to nitrocellulose membranes and probed with indicated antibodies.

**Supplementary Figure S7. Overexpression of 14-3-3 $\zeta$  decreases hVps34 activity meanwhile blocking C2-ceramide-dependent autophagy in HEK293T cells.** HEK293T cells were transfected with GFP-control (C) or GFP-14-3-3 $\zeta$ . (A) Continuously serum-grown cell extracts (1 mg) were incubated with 1  $\mu$ g of hVps34 (Echelon Biosciences) antibody bound to Protein-G-Sepharose. The washed immunoprecipitates were used for hVps34 *in vitro* kinase assay and also resolved to detect Beclin-1 and hVps34 proteins. Cell extracts (30  $\mu$ g) from both samples were run on SDS-PAGE, transferred to nitrocellulose membranes and probed with indicated antibodies (bottom panel) (Top panel: Quantification of hVps34 *in vitro* kinase assay expressed as PI(3) fold change, N = 3, \*  $P=0.006$  Student *t*-test). (B) Cell extracts (30  $\mu$ g) from left untreated (U) or C2-ceramide (10  $\mu$ M for 24h) stimulated (C2) were run on SDS-PAGE, transferred to nitrocellulose membranes and probed with indicated antibodies. Endogenous LC3-II/Tubulin levels were quantified and the ratio presented as arbitrary units (N=3, \*  $P=0.0045$  Student *t*-test). (C) Cell extracts (2 mg) from left untreated (U) or C2-ceramide (10  $\mu$ M for 24h) stimulated (C2) cells were incubated with 1  $\mu$ g of Beclin-1 (Santa Cruz) antibody bound to Protein-G-Sepharose. The washed immunoprecipitates were used for hVps34 *in vitro* kinase assay and to analyse presence of Beclin-1 and hVps34 proteins in immunoprecipitates. (On the top: Quantifications of hVps34 *in vitro* kinase assays, N = 3, \*  $P=0.0059$ , Student *t*-test).

**Supplementary Figure S8. Downregulation of endogenous 14-3-3 $\zeta$  increase hVps34 activity in MCF-7 cells.** MCF-7 cells were transfected either with siRNA oligonucleotide targeting 14-3-3 $\zeta$  or with a scrambled RNA oligonucleotide as described in Material and Methods. After 48 hours, extract of untransfected (Control) or transfected either with siRNA 14-3-3 $\zeta$  (14-3-3 $\zeta$ ) or scrambled siRNA (SC) MCF-7 cells were incubated with

1  $\mu$ g of hVps34 (Echelon Biosciences) antibody bound to Protein-G-Sepharose. The washed immunoprecipitates were used for hVps34 *in vitro* kinase assay and to analyse presence of hVps34 protein in immunoprecipitates (Top panel: Quantification of hVps34 *in vitro* kinase assay, N = 3, \*  $P=0.025$ , \*\*  $P=0.011$ , Student *t*-test). Extracts from untransfected cells (C) or transfected either with siRNA 14-3-3 $\zeta$  (14-3-3 $\zeta$ ) or scrambled siRNA (SC) were harvested for immunoblot analysis of 14-3-3 $\zeta$  isoform. Tubulin was used as a protein loading control (bottom panel).

**Supplementary Figure S9. hVps34 dissociates from 14-3-3 and is activated during Starvation-induced autophagy in MCF-7 cells.** (A) MCF-7 cells expressing GFP-LC3 fusion protein and continuously growing in serum were left untreated or starved during 6h. Cells were analysed using green fluorescence GFP-LC3 by microscopy. Bars = 10  $\mu$ m. Quantification of number of GFP-LC3 punctae per cell was performed by counting in a blinded experiment. Columns, average of three different experiments, set up at duplicated samples and counting 6 x 100 cells per sample (N=3, \*  $P=0.00027$ , Student *t*-test ) (top panel). Untreated and starved MCF-7/GFP-LC3 cells were harvested for immunoblot analysis indicated proteins. Tubulin was used as a protein loading control (bottom panel). (B) MCF-7/GFP-LC3 cells were treated as in (A) and extracts from untreated and starved cells were incubated with 1  $\mu$ g of hVps34 (Echelon Biosciences) antibody bound to Protein-G-Sepharose. The washed immunoprecipitates were used for hVps34 *in vitro* kinase assay and test presence of hVps34 protein in immunoprecipitates and 14-3-3-binding (DIG-14-3-3) (Top panel: Quantification of hVps34 *in vitro* kinase assay, N = 3, \*  $P=0.0035$ , Student *t*-test).

**Supplementary Figure S10. hVps34 dissociates from 14-3-3 during Etoposide and Rapamycin-induced autophagy.** (A) HeLa continuously grown in serum (C) were left untreated or incubated in presence or absence of 3-methyladenine (3MA) (10 mM for 1 h) and then stimulated with Etoposide (20  $\mu$ M for 24 h) as indicated. Cell extracts were incubated with 1  $\mu$ g of hVps34 (Echelon Biosciences) antibody bound to Protein-G-Sepharose. The washed immunoprecipitates were used to test presence of hVps34 protein in immunoprecipitates and 14-3-3-binding (DIG-14-3-3) (Quantification of DIG-14-3-3 overlay signal, N = 3, \*  $P=0.00081$ , \*\*  $P=0.00014$ , Student *t*-test). (B) HeLa/GFP-LC3 cells treated as in (A) were analysed using green fluorescence GFP-LC3 by microscopy.

Quantification of number of GFP-LC3 punctae per cell was performed by counting in a blinded experiment. Columns, average of three different experiments, set up at duplicated samples and counting 6 x 100 cells per sample (N=3, \*  $P=0,0021$ , \*\*  $P=0,009$ , Student *t*-test). (C) HeLa cells treated as in (A) were harvested for immunoblot analysis of indicated proteins. GAPDH was used as a protein loading control. (Endogenous LC3-II/GAPDH levels were quantified and the ratio presented as arbitrary units (N=3, \*  $P=0.00097$ , \*\*  $P=0.00072$ , Student *t*-test). (D) MCF-7/GFP-LC3 cells continuously grown in serum (C) were left untreated or incubated in presence or absence of 3-methyladenine (3MA) (10 mM for 1 h) and then stimulated with Rapamycin (5  $\mu$ M for 24 h) as indicated. Cell extracts were incubated with 1  $\mu$ g of hVps34 (Echelon Biosciences) antibody bound to Protein-G-Sepharose. The washed immunoprecipitates were used to test presence of hVps34 protein in immunoprecipitates and 14-3-3-binding (DIG-14-3-3) (Quantification of DIG-14-3-3 overlay signal, N = 3, \*  $P=0.0018$ , \*\*  $P=0.002$ , Student *t*-test). (E) MCF-7/GFP-LC-3 cells treated as in (D) were analysed using green fluorescence GFP-LC3 by microscopy. Quantification of number of GFP-LC3 punctae per cell was performed by counting in a blinded experiment. Columns, average of three different experiments, set up at duplicated samples and counting 6 x 100 cells per sample (N=3, \*  $P=0,00014$ , \*\*  $P=0,00031$ , Student *t*-test). (F) MCF-7/GFP-LC-3 cells treated as in (D) were harvested for immunoblot analysis of indicated proteins. GAPDH was used as a protein loading control. (Endogenous LC3-II/GAPDH levels were quantified and the ratio presented as arbitrary units (N=3, \*  $P=0.00045$ , \*\*  $P=0.00092$ , Student *t*-test).

**Supplementary Figure S11. hVps34 from lung mouse tissue binds 14-3-3 proteins.** (A) Extract of lung mouse tissue and HeLa cells continuously growing in serum (30  $\mu$ g) were run on SDS-PAGE, transferred to nitrocellulose membranes and probed with indicated antibodies. GAPDH was used as a protein loading control. (B) Extract of lung mouse tissue (3-5 mg of protein) were incubated for 2 h with 50  $\mu$ l of 14-3-3-Sepharose, pellets were washed (C) and extracted with SDS-sample buffer (Pull down), run on SDS/PAGE and probed with antibodies against hVps34. Beside, lung mouse tissue extract (Ext) were run in term of comparison. (C) Extract of lung mouse tissue (2 mg of protein) was incubated with 1  $\mu$ g of hVps34 (Echelon Biosciences) antibody bound to Protein-G-Sepharose. The washed immunoprecipitates, from extract (IP) or control (C), were resolved

in SDS-PAGE, transferred to nitrocellulose and probed with DIG-14-3-3 (14-3-3 overlay) and hVps34 (Zymed) antibodies.

**Supplementary Figure S12. Serum-free medium increases hVps34 lipid kinase activity.** Continuously serum-grown HeLa cells were left untreated (U) or serum-starved (-S) for 16 h. Cells extracts (1 mg) from both samples were incubated with 1  $\mu$ g of hVps34 antibody bound to Protein-G-Sepharose. The washed immunoprecipitates were used for hVps34 *in vitro* kinase assay and also resolved to detect hVps34 protein (Top panel: Quantification of hVps34 *in vitro* kinase assay expressed as PI(3) fold change, N = 3, \*  $P=0.0029$ , Student *t*-test). Additionally, cell extract (30  $\mu$ g) was used for immunoblot analysis of indicated proteins. Tubulin was used as a protein loading control.

**Supplementary Figure S13. hVps34 binds 14-3-3 proteins by a PMA-phosphorylation-dependent mechanism in HEK293T cells.** HEK293T cells growing in medium containing serum were treated with C2-ceramide (10  $\mu$ M, 24 h) (C2) or serum-starved for 16 h and where indicated, cells were incubated with H-7 (100  $\mu$ M), PD 184352 (2  $\mu$ M) or no inhibitor for 1 h before stimulation with PMA (400 ng/ml) for a further 15 min. Extract from HEK293T cells were incubated with 1  $\mu$ g of hVps34 (Echelon Biosciences) antibody bound to Protein-G-Sepharose. The washed immunoprecipitates were used to detect hVps34 protein and for interaction with 14-3-3 proteins by analysing DIG-14-3-3. Cell extracts (30  $\mu$ g) from both samples were run on SDS-PAGE, transferred to nitrocellulose membranes and probed with indicated antibodies (bottom panel).

**Supplementary Figure S14. Amino acid sequence of hVps34 with the 14-3-3-binding domains.** The amino acid sequence of hVps34 with the 14-3-3-binding domains is shown. Length of deletion mutants MT1 (1-680 aa) and MT2 (1-390 aa) can be distinguish by asterisk (\*). Serines or Threonines mutated to Alanine by site-directed mutagenesis are shown in bold. Underlined sequences show Thr197 and S212 domains whose change to Alanine reduces its 14-3-3-binding status.

## Supplementary Figure S1

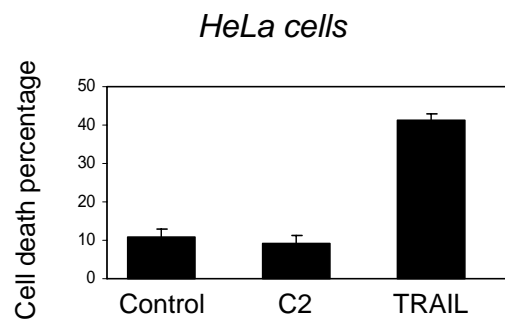



## Supplementary Figure S2

*HEK293T cells*

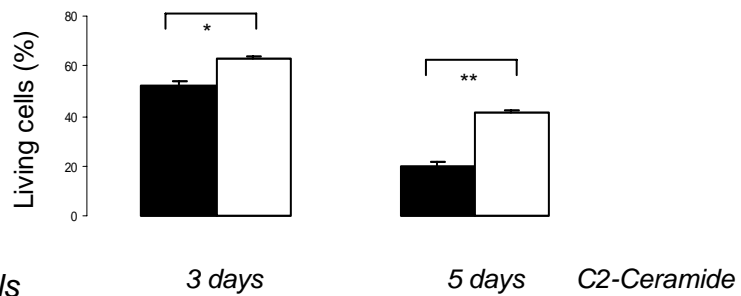

*HeLa cells*

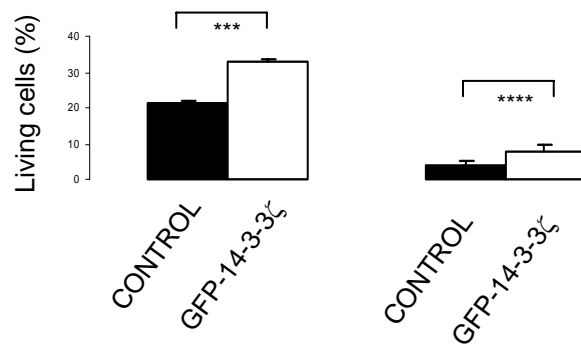

# Supplementary Figure S3

A

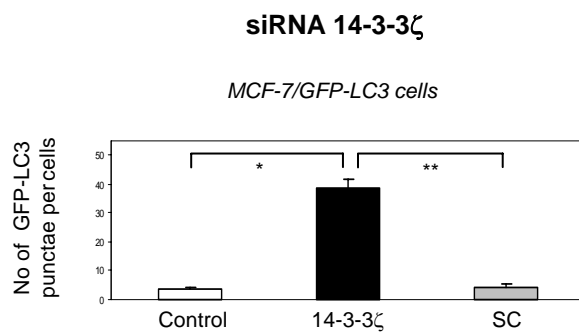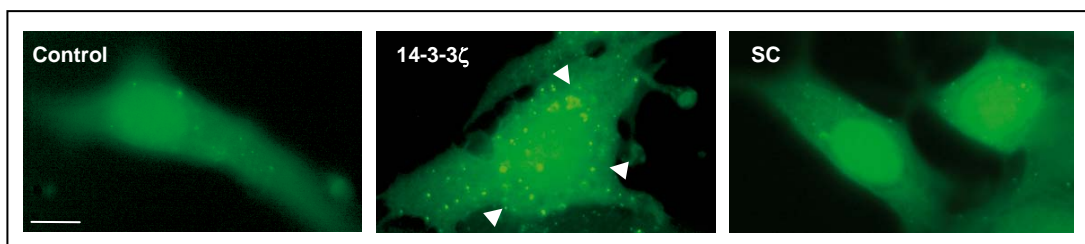

B

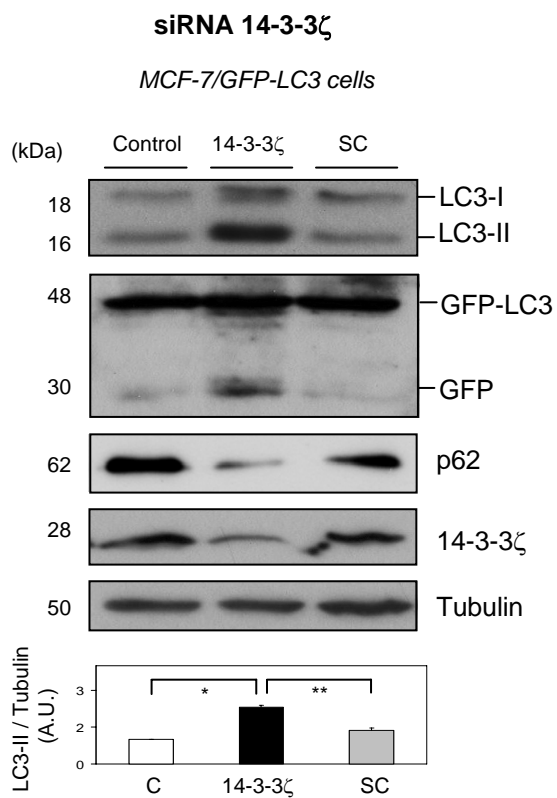

## Supplementary Figure S4

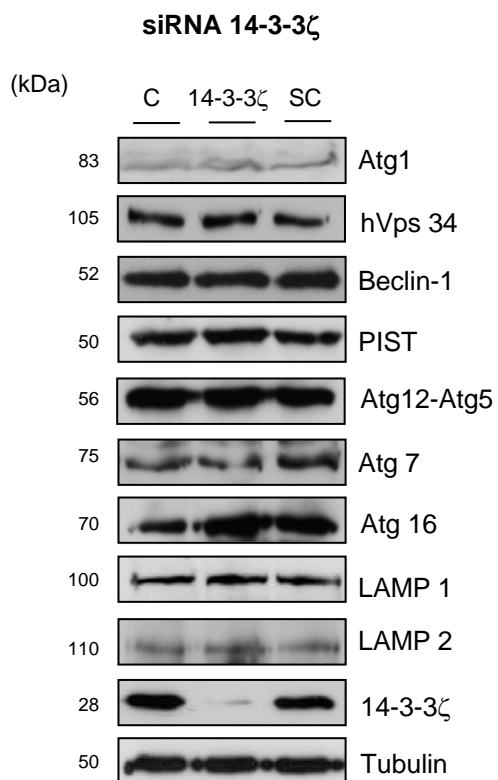

# Supplementary Figure S5

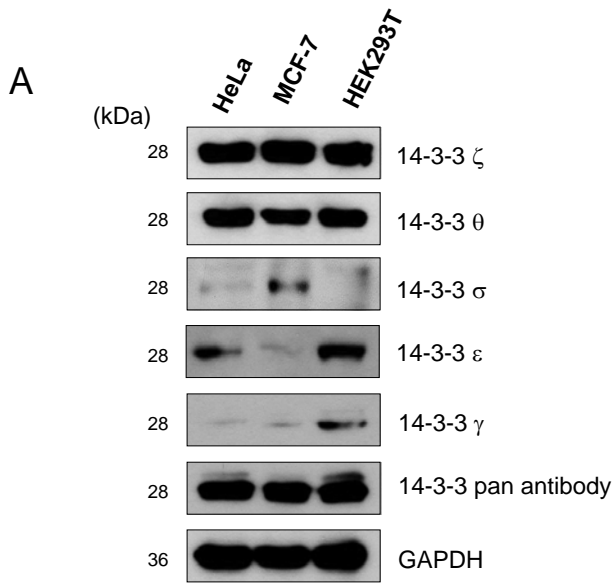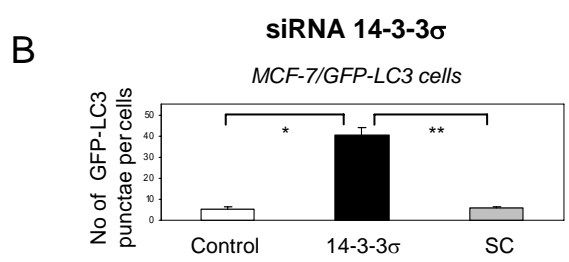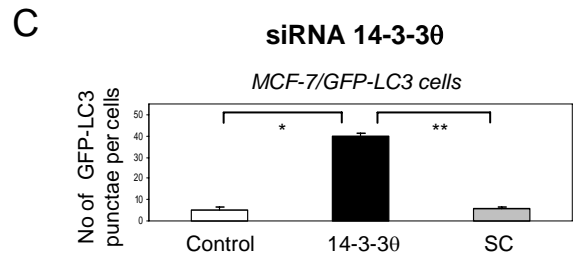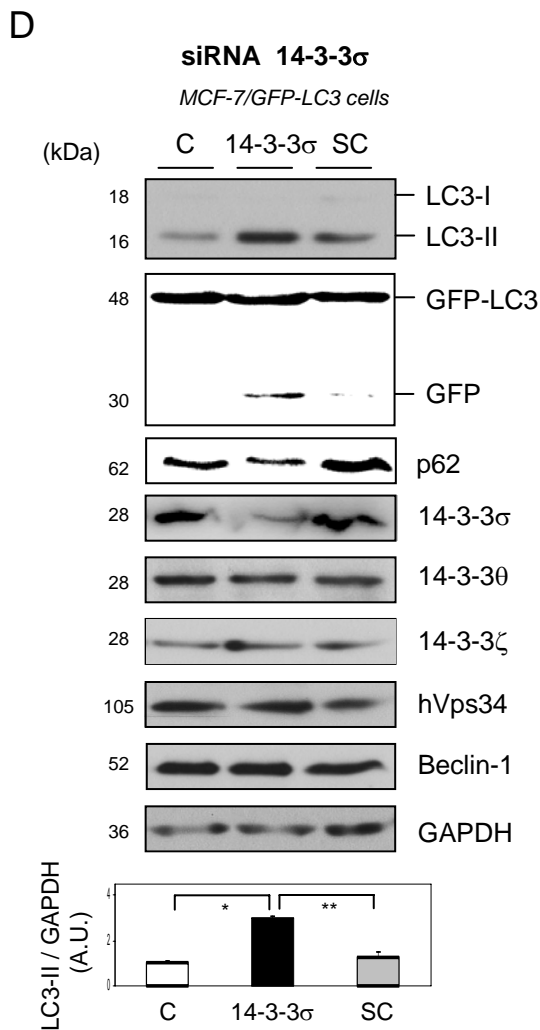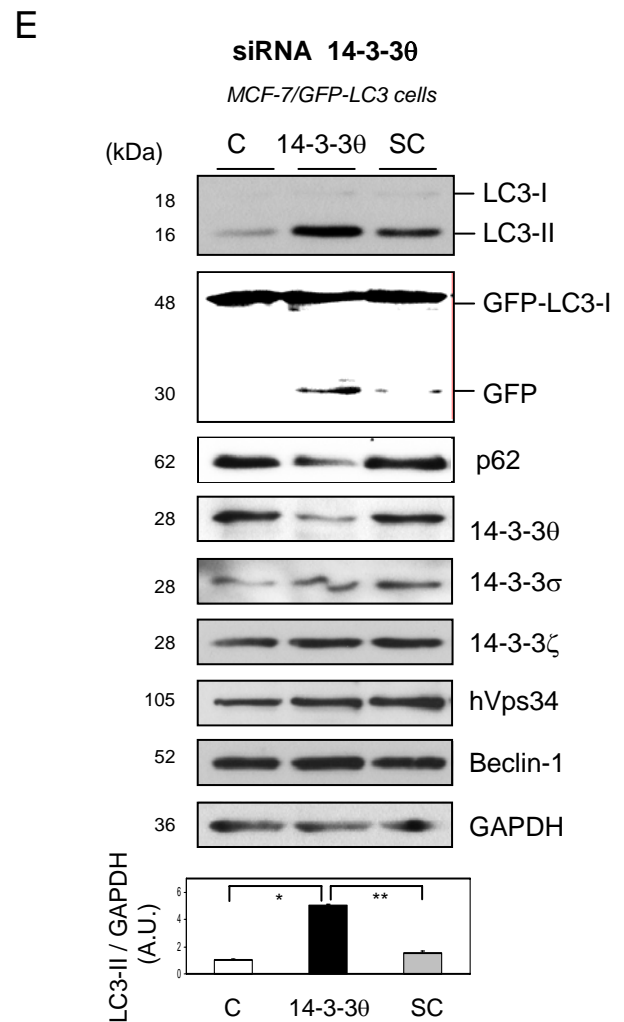

# Supplementary Figure S6

A

IP: Beclin-1

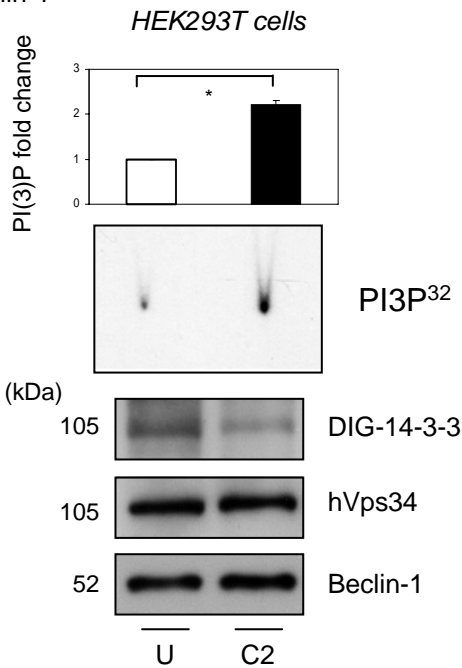

B

IP: hVps34

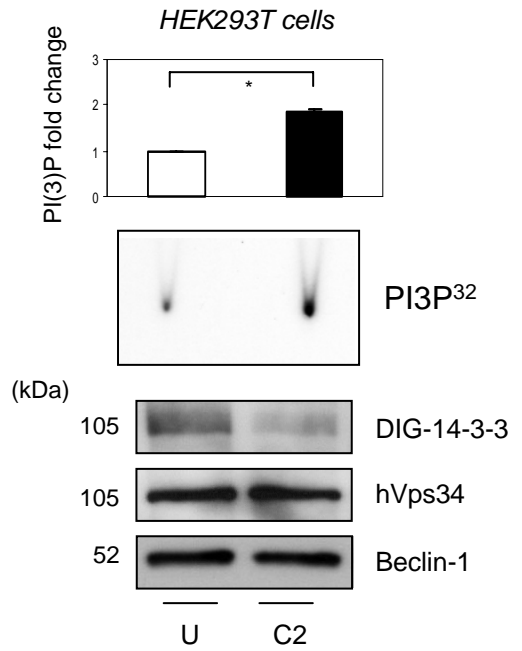

C

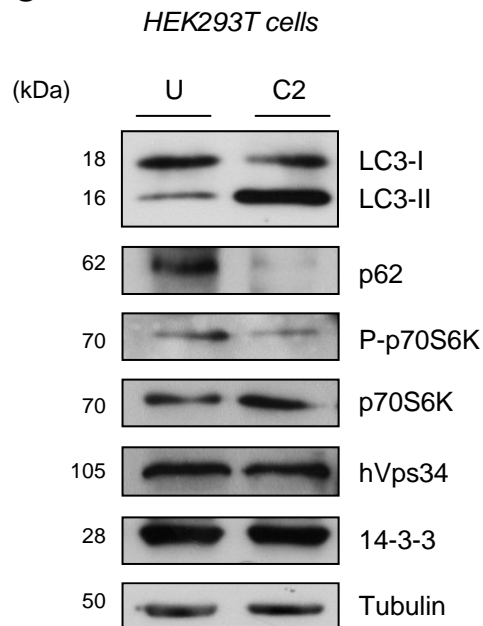

# Supplementary Figure S7

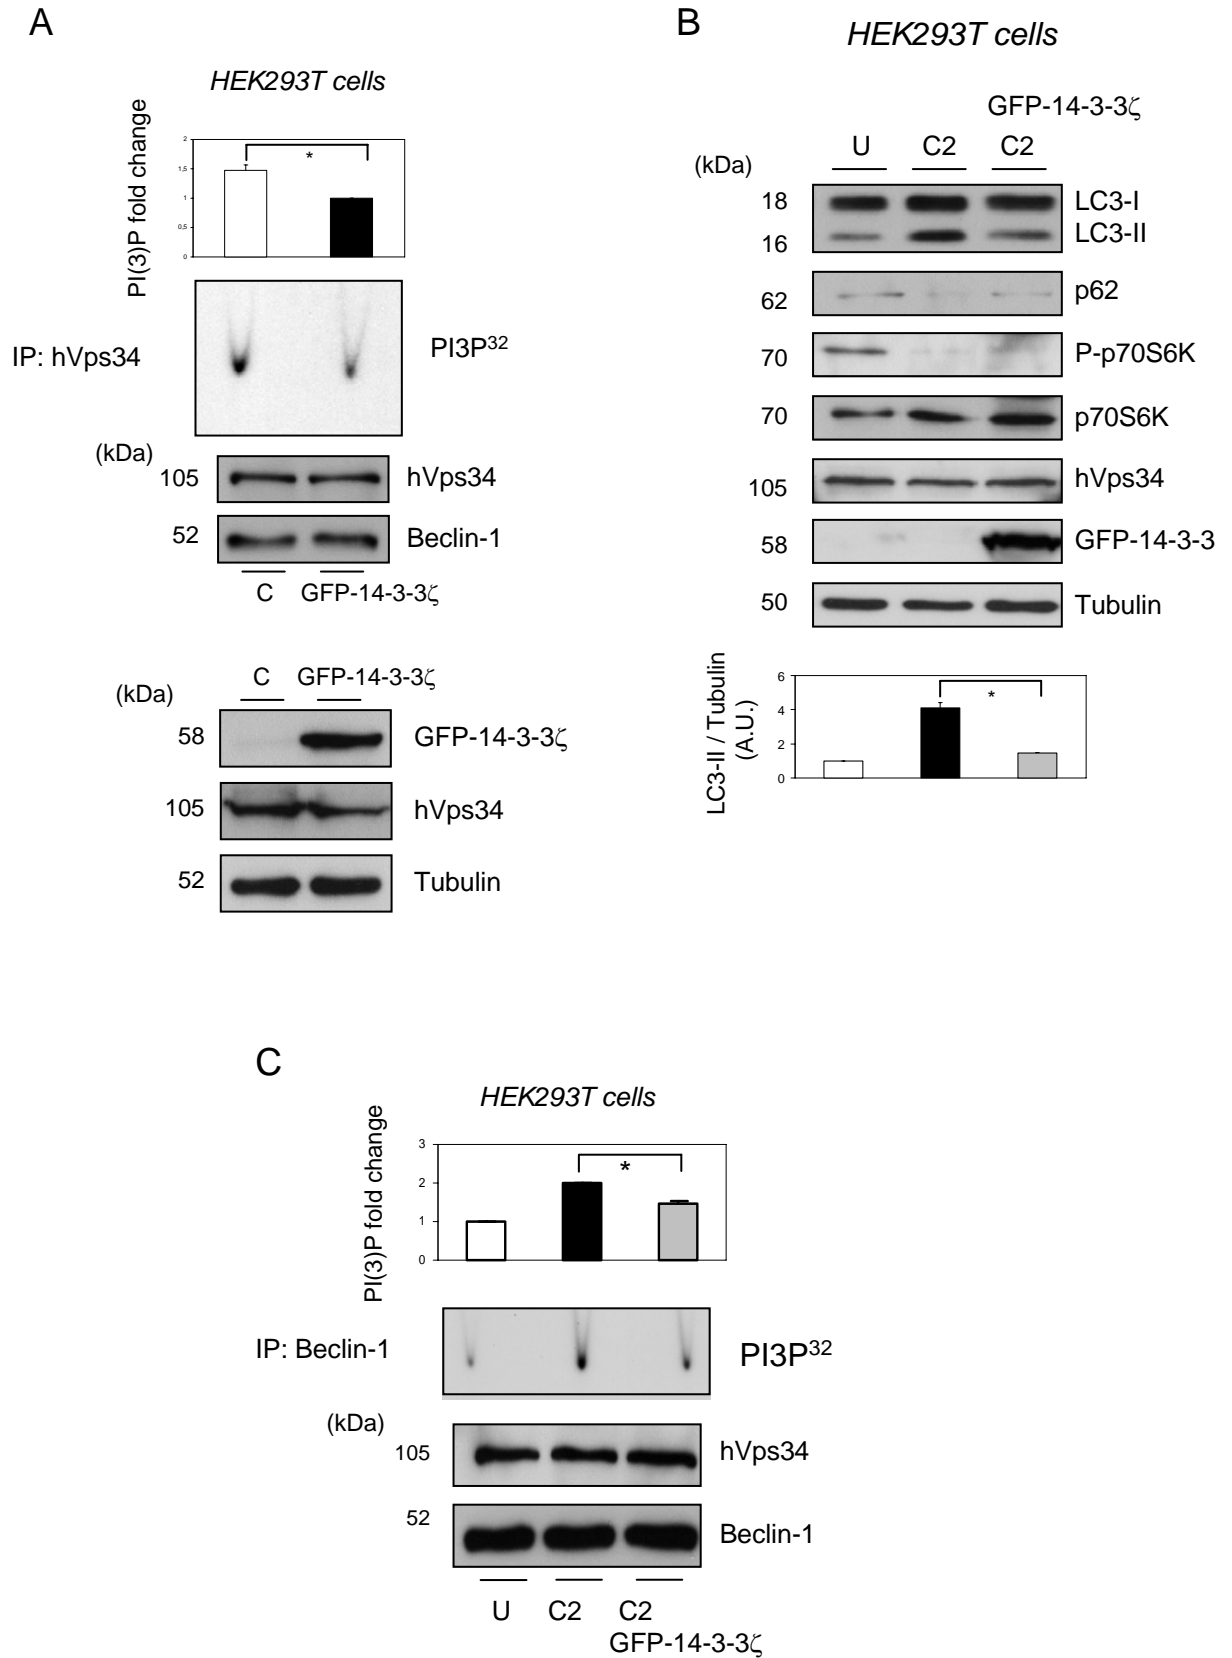

# Supplementary Figure S8

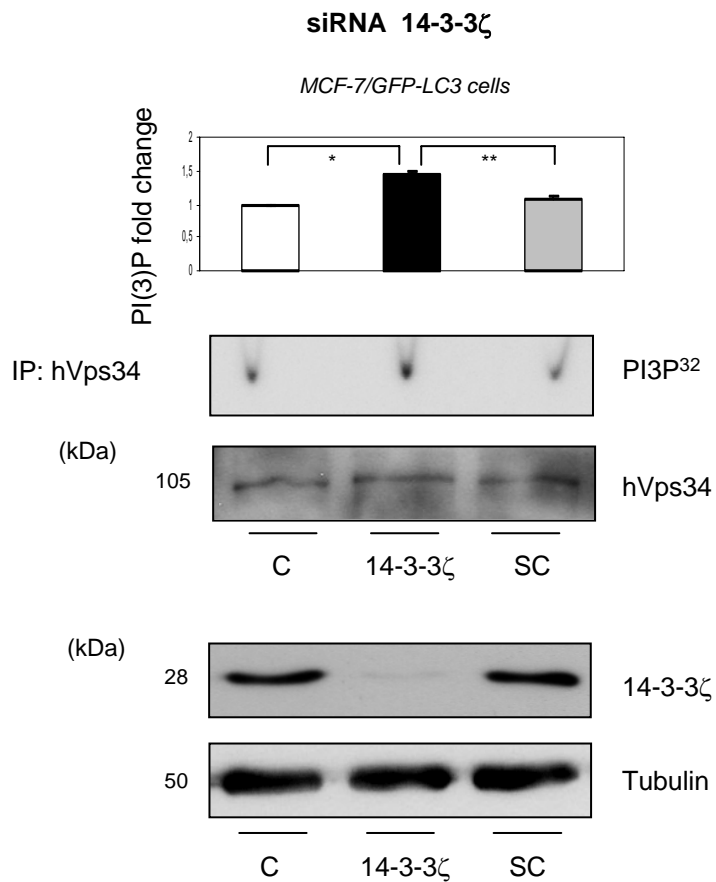

# Supplementary Figure S9

A

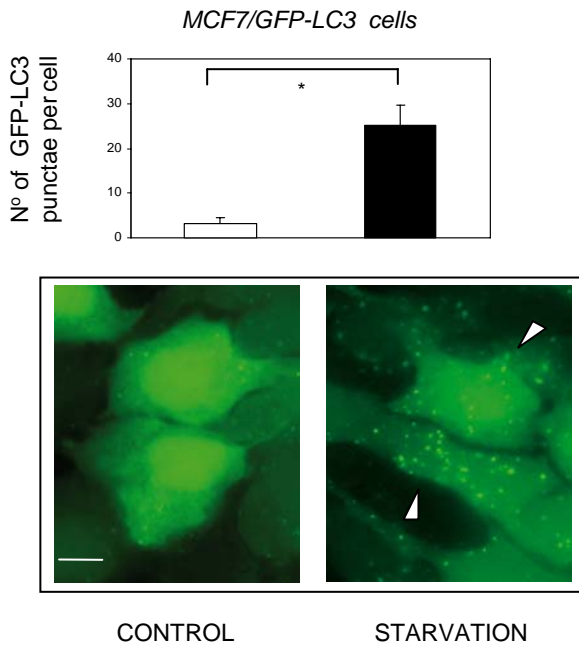

B

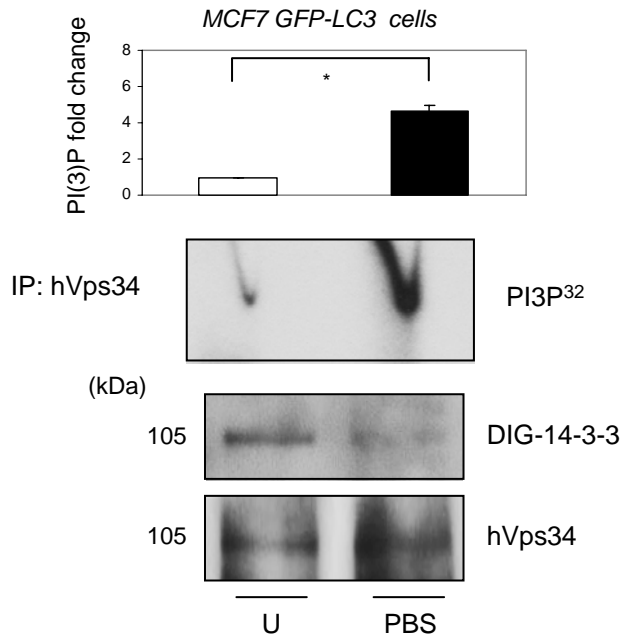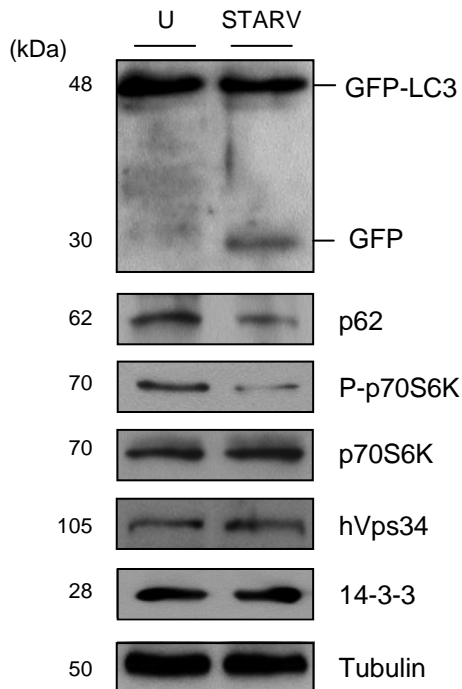



# Supplementary Figure S10

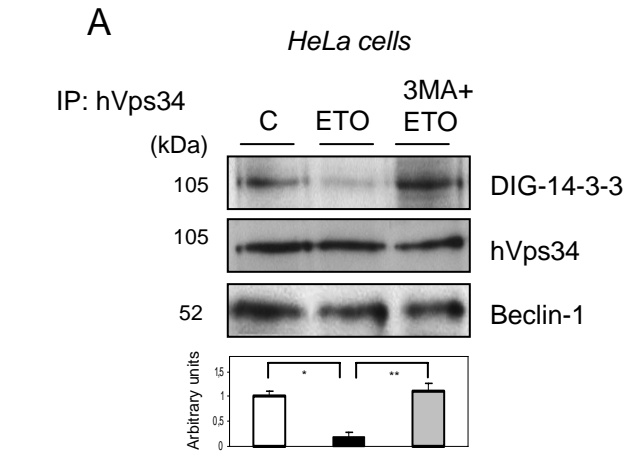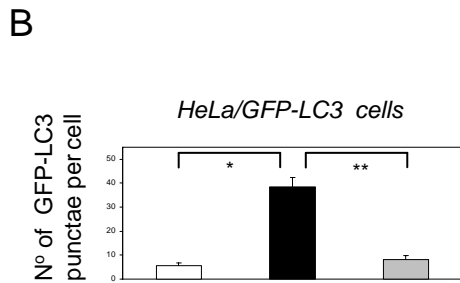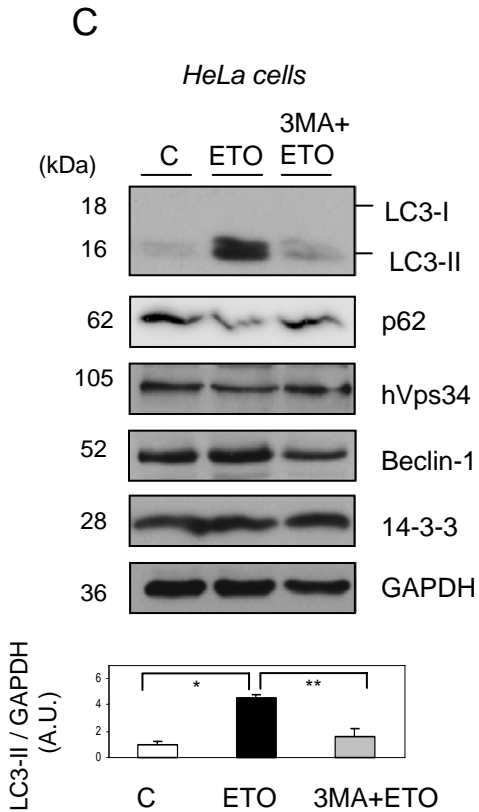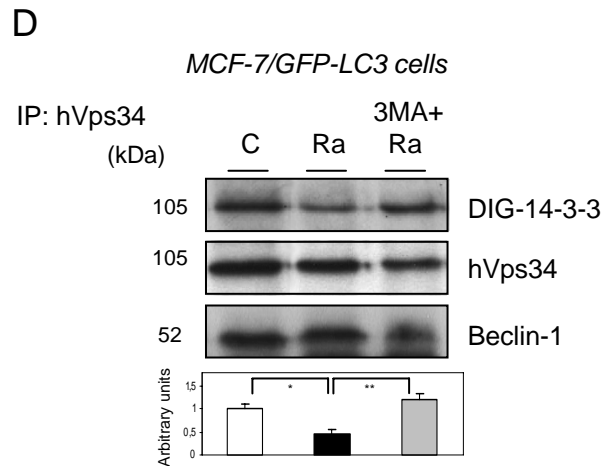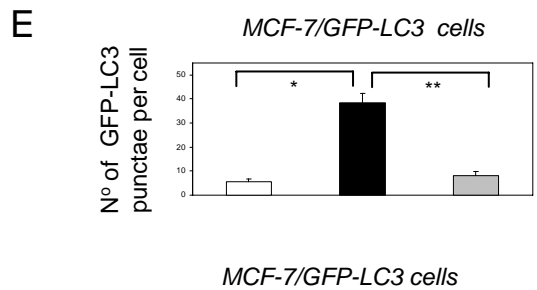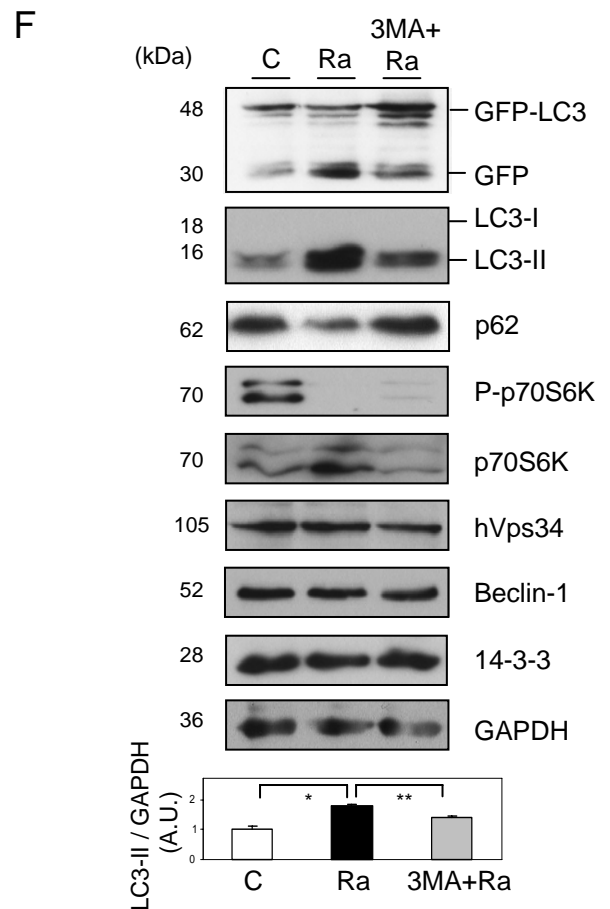

# Supplementary Figure S11

A

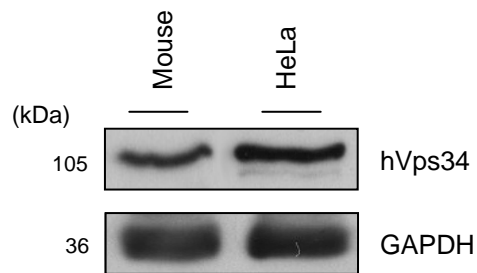

B

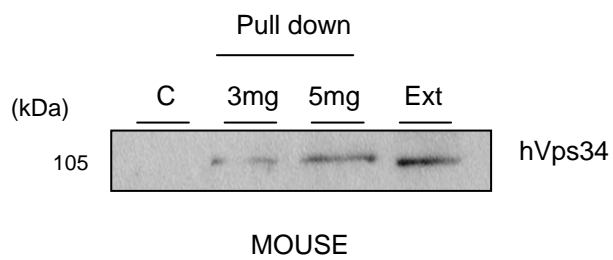

C

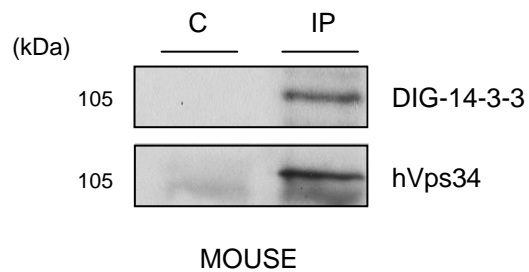

# Supplementary Figure S12

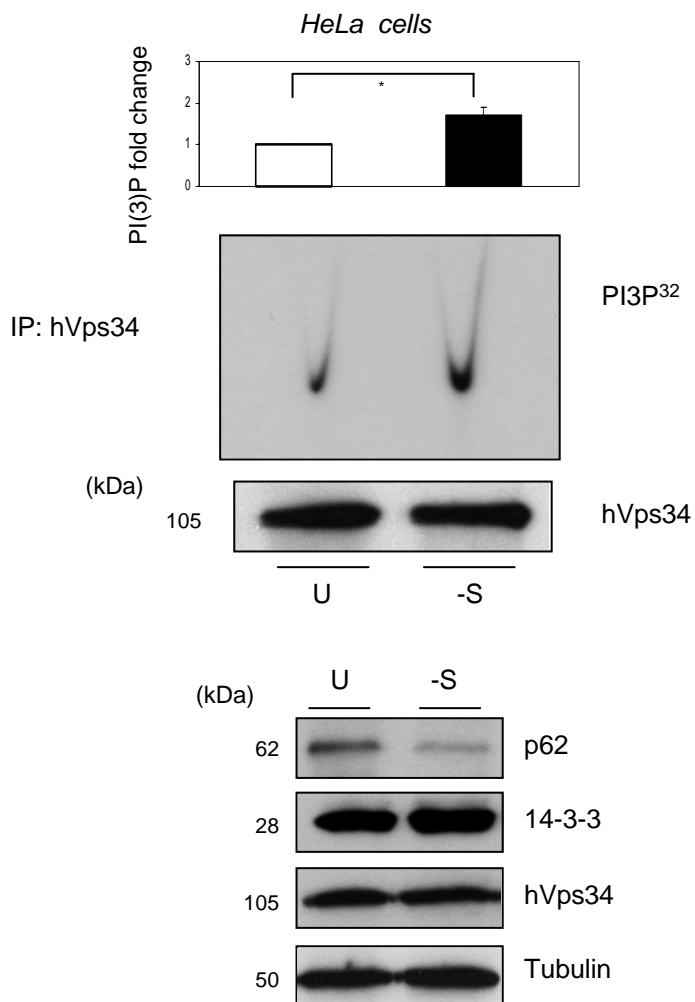

# Supplementary Figure S13

HEK293T cells

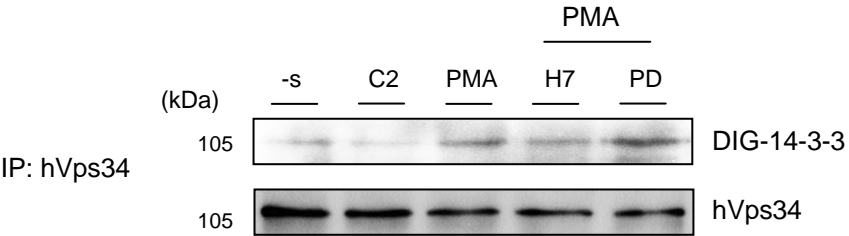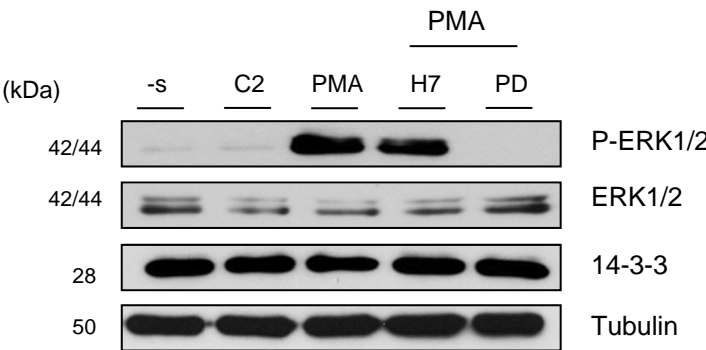

# Supplementary Figure S14

MT2

1 MGEAEKFHYI YSCDLLINVQ LKIGSLEGKR EQKS<sub>34</sub>YKAVLE DPMLKFSGLY QETCSDLYVT  
61 CQVFAEGKPL ALPVRT<sub>76</sub>S<sub>77</sub>YKA FSTRWNWNEW LKLPVKYPDL PRNAQVALTI WDVYGP GKAV  
121 PVGGTTVSLF GKYGMFRQGM HDLKVWPNVE ADGSEPTKTP GRT<sub>163</sub>S<sub>164</sub>S<sub>165</sub>T<sub>166</sub>LSED QMSRLAKLTK  
181 AHRQGHMVKV DWLDRLT<sub>197</sub>FRE IEMINESEKR SS<sub>212</sub>NFMYLMVE FRCVKCDDKE YGIVYYEKDG  
241 DESSPILTSF ELVKVPDPQM SMENLVESKH HKLARS<sub>276</sub>LRS<sub>279</sub>G PSDHDLKPNA ATRDQLNIIV  
301 SYPPTKQLTY EEQDLVWKFR YYLTNQE KAL TKFLKCVNWD LPQEAKQALE LLGKWKPM DV  
361 EDSLELLSSH YTNPTVRRYA VARLRQADDE \* DLLMYLLQLV QALKYENFDD IKNGLEPTKK  
421 DSQSSVSENV SNSGINS AEI DSSQIITSPL PSVSSPPPAS KTKEVPDGEN LEQDLCTFLI  
481 SRACKNSTLA NYLYWYVIVE CEDQDTQQRD PKTHEMYLNV MRRFSQALLK GDKSVRVMRS  
541 LLAAQQT FVD RLVHLMKAVQ RESGNRKKKN ERLQALLGDN EKMNLSDEL IPLPLEPQVK  
601 IRGIIPETAT LFKSALMPAQ LFFKTEDGGK YPVIFKHGDD LRQDQLILQI ISLMDKLLRK  
661 ENLDLKLTPY KVLATSTKHG \* FMQFIQSVPV AEVLDT EGS I QNFFRKYAPS ENGPNGISAE  
721 VMDTYVKSCA GYCVITYILG VGDRHLDNLL LTKTGKLFHI DFGYILGRDP KPLPPPMLN  
781 KEMVEGMGGT QSEQYQEFRK QCYTAFHLR RYSNLILNLF SLMVDANIPD IALEPDKTVK  
841 KVQDKFRDL SDEEAVHYMQ SLIDESVHAL FAAVVEQIHK FAQYWRK

MT1
